# Supplementary material for: A long-term dataset of simulated epilimnion and hypolimnion temperatures in 401 French lakes (1959–2020)
Source: Copernicus journal article supplement (doi:10.5194/essd-2022-457), 2023-02-14
Supplement: Supplementary file [file essd-2022-457-RC1-supplement.pdf]

A long-term dataset of simulated epilimnion and hypolimnion temperatures in 401 lakes (1959-2020)

The manuscript presents a dataset of simulated lake water temperature of 401 French lakes using a modelling approach. The modelling approach is well explained as well as the choices of how to calibrate (or not) the model parameters. I appreciate the fact that authors discuss the limitations of the dataset as well as the suitable applications, making clear for which purposes this dataset would be limiting.

I think that the presented dataset is relevant to leverage lake research in the context of climate change. The manuscript it is overall well written but I suggest some modifications that I list below.

In the following paragraph, I collect the minor issues from my review.

**Minor issues:**

- L58 – “with the scarcity of...”. I suggest rephrasing this sentence.
- L61 – “...epilimnion and hypolimnion temperature”, I suggest adding “water” before temperatures.
- L62 – “We also...”. I suggest rephrasing for consistency with the rest of the abstract.
- L71 – I suggest substituting “by” with “and”.
- L89 – I suggest changing the beginning of the paragraph which sounds not very fluent.
- L93 – “rendering it challenging”, please rephrase.
- L94 – “which is” should be removed.
- L105-107. I suggest to rephrase this sentence for clarity.
- L155 – please add reference at the end of the sentence reporting the ALAMODE model.
- Paragraph from L 188. I suggest adding the reason why sometimes SAFRAN has been used and some other times S2M has been used already in this paragraph otherwise the reader remains with this doubt for too long.
- L280 – I suggest adding a reference at the end of the first sentence of the paragraph.
